# Supplementary material
Source: PubMed Central journal article supplement (PMC3882911)
Supplement: mmc1.pdf [file mmc1.pdf]

The American Journal of Human Genetics, Volume 94

## **Supplemental Data**

### **Mutations in *TBC1D24*, a Gene Associated With Epilepsy,**

### **Also Cause Nonsyndromic Deafness DFNB86**

**Atteeq U. Rehman, Regie Lyn P. Santos-Cortez, Robert J. Morell, Meghan C. Drummond, Taku Ito, Kwanghyuk Lee, Asma A. Khan, Muhammad Asim R. Basra, Naveed Wasif, Muhammad Ayub, Rana A. Ali, Syed I. Raza, University of Washington Center for Mendelian Genomics, Deborah A. Nickerson, Jay Shendure, Michael Bamshad, Saima Riazuddin, Neil Billington, Shaheen N. Khan, Penelope L. Friedman, Andrew J. Griffith, Wasim Ahmad, Sheikh Riazuddin, Suzanne M. Leal, and Thomas B. Friedman**

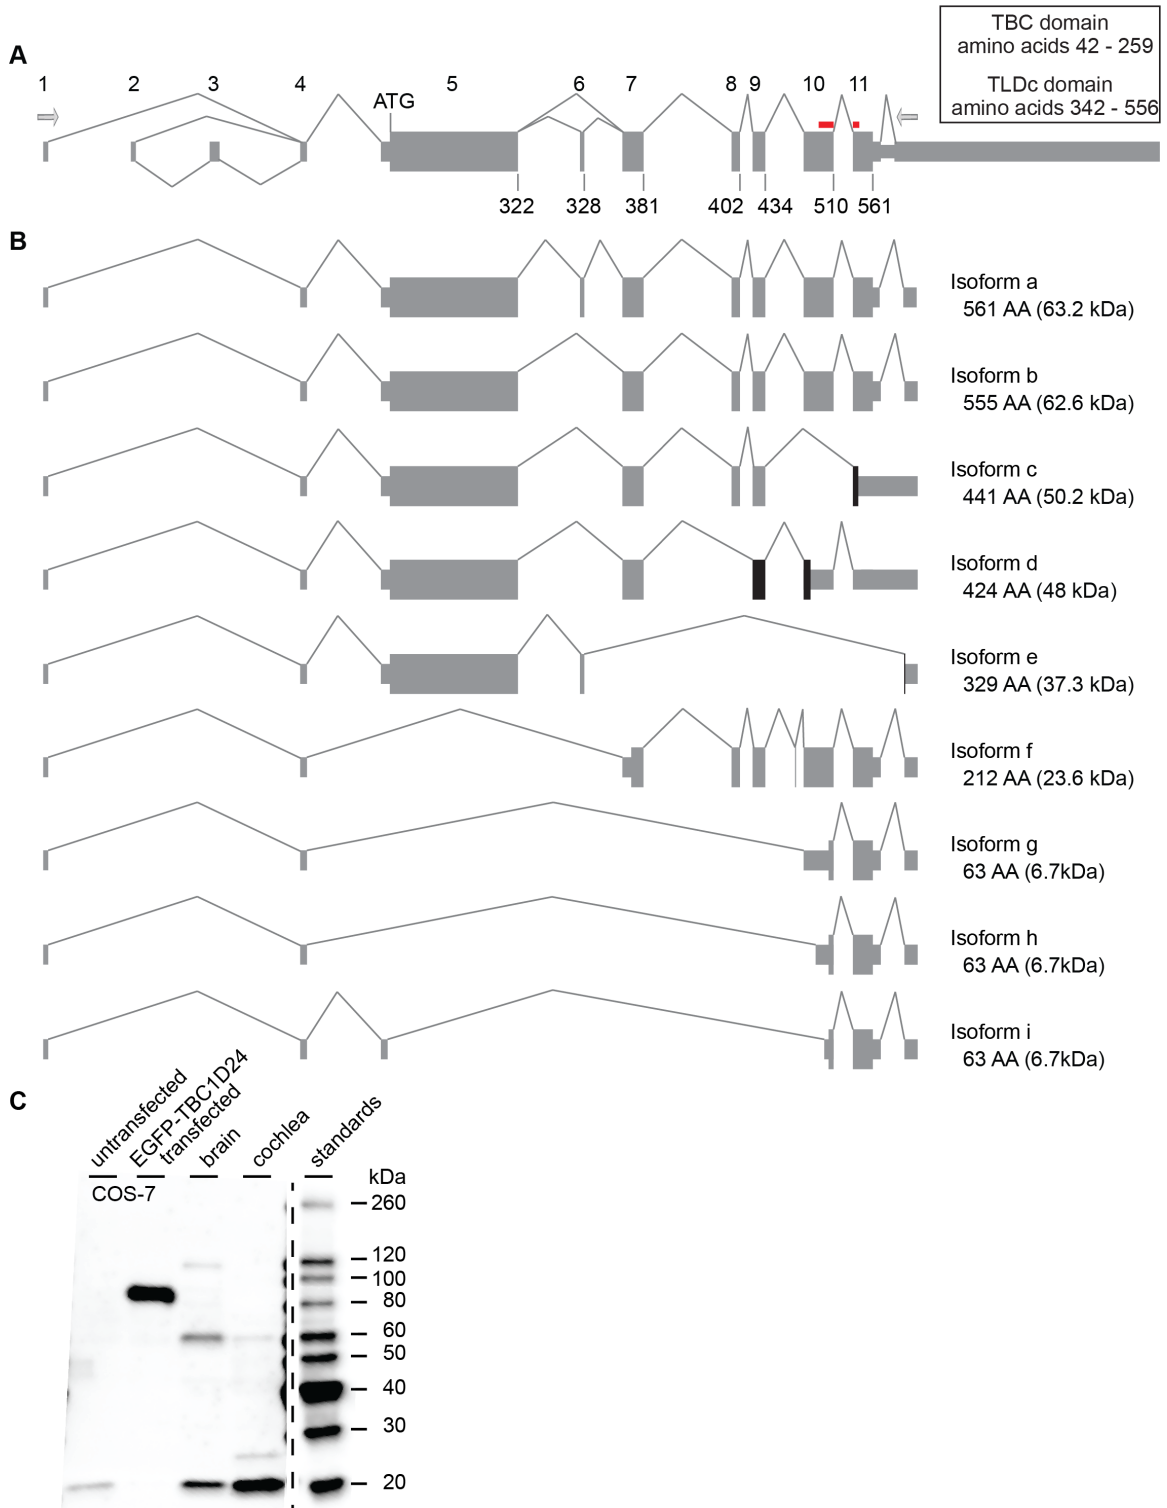

**Figure S1. *Tbc1d24* Exon Splicing Patterns Identified in the Mouse Inner Ear**

**(A)** Spliced transcripts of mouse *Tbc1d24* annotated in the NCBI Gene database on October 30, 2013. Thick bars represent exons. Thin bars are UTRs. Angled lines joining the exon boundaries depict mRNA splicing events. The residue number encoded by the last codon of each exon is shown below the diagram. The two red bars represent the location of exonic sequences that encode the epitope for a commercial antibody (Abcam, ab101933), which was used for western blot analyses and immunolocalization experiments (Figure 4). The two arrows indicate the forward and reverse PCR primers used to amplify *Tbc1d24* transcripts from a mouse inner ear cDNA library.

**(B)** Alternatively spliced transcripts of *Tbc1d24* detected in cDNA prepared from a postnatal day 12 mouse inner ear. The PCR primer pair (arrows, panel A) used in this assay will not amplify transcripts that contain either exons 2 or 3 or both as well as the portion of the 3' UTR downstream of the primer in exon 11. In addition to the previously known isoforms a and b, we identified seven additional putative protein isoforms arising from splice variants expressed in the inner ear of mouse. Black bars indicate exons that encode deduced residues in a reading frame different from the other isoforms of TBC1D24 described here.

**(C)** Western blot analysis of postnatal day 12 (P12) mouse brain and cochlea lysates reveal anti-TBC1D24 antibody binding at 60 kDa and 20 kDa. A rabbit polyclonal anti-TBC1D24 (Abcam) was used at a dilution of 1:1,000 in ELC Plus blocking solution (GE) and a HRP-conjugated goat anti-rabbit-IgG (Sigma) was used at 1:100,000 dilution in blocking solution. 0.5 micrograms of lysate from transfected and untransfected COS-7 cells and 15 micrograms of total tissue lysate from mouse brain and mouse cochlea were

size separated on 4-20% SDS PAGE. The antibody detects a product of the predicted size (90 kDa) in the lysate of COS-7 cells expressing EGFP-TBC1D24, but not in an untransfected COS-7 cell lysate. All lysates were prepared in RIPA supplemented with HALT Protease Inhibitor Cocktail (Pierce).

**Table S1. Inbreeding Coefficients Based on Pedigree Structure**

| <b>Family</b> | <b>Affected Individual<sup>a</sup></b> | <b>Parental Relations</b> | <b><sup>b</sup>Inbreeding Coefficient</b> |
|---------------|----------------------------------------|---------------------------|-------------------------------------------|
| PKDF799       | III-11                                 | Unrelated                 | 0                                         |
|               | III-13                                 | Unrelated                 | 0                                         |
|               | IV-13                                  | First cousins             | 0.0625                                    |
|               | IV-14                                  | First cousins             | 0.0625                                    |
|               | IV-15                                  | First cousins             | 0.0625                                    |
|               | IV-16                                  | First cousins             | 0.0625                                    |
|               | IV-17                                  | First cousins             | 0.0625                                    |
|               | IV-22                                  | First cousins             | 0.0625                                    |
|               | IV-23                                  | First cousins             | 0.0625                                    |
|               | IV-30                                  | Double first-cousins      | 0.25                                      |
|               | IV-31                                  | Double first-cousins      | 0.25                                      |
|               | Median                                 |                           | 0.0625                                    |
| DEM4221       | II-7                                   | Unrelated                 | 0                                         |
|               | III-2                                  | Unrelated                 | 0                                         |
|               | III-6                                  | Unrelated                 | 0                                         |
|               | IV-3                                   | Unrelated                 | 0                                         |

|         |        |                |          |
|---------|--------|----------------|----------|
|         | IV-5   | Unrelated      | 0        |
|         | IV-10  | Second cousins | 0.015625 |
|         | IV-11  | Second cousins | 0.015625 |
|         | V-1    | First cousins  | 0.0625   |
|         | V-2    | Second cousins | 0.015625 |
|         | Median |                | 0        |
| DEM4587 | IV-1   | First cousins  | 0.0625   |
|         | IV-2   | First cousins  | 0.0625   |
|         | IV-3   | First cousins  | 0.0625   |
|         | IV-5   | First cousins  | 0.0625   |
|         | Median |                | 0.0625   |
| DEM4476 | IV-2   | First cousins  | 0.0625   |
|         | IV-4   | First cousins  | 0.0625   |
|         | IV-5   | First cousins  | 0.0625   |
|         | IV-6   | First cousins  | 0.0625   |
|         | IV-7   | First cousins  | 0.0625   |
|         | IV-8   | First cousins  | 0.0625   |
|         | IV-9   | First cousins  | 0.0625   |
|         | Median |                | 0.0625   |

---

<sup>a</sup>Generation and ID for each affected individual is based on Figure 2.

<sup>b</sup>Cryptic consanguinity for each of these families is highly plausible, and we do not have enough genetic information to derive inbreeding coefficients. Therefore, the inbreeding coefficient for each family is based on pedigree structure.

---

**Table S2. Summary of Exome Sequencing Data From Affected Members of Three Families Segregating Deafness Linked to *DFNB86***

|                                                           | <b>PKDF799</b> | <b>DEM4221</b> | <b>DEM4476</b> |
|-----------------------------------------------------------|----------------|----------------|----------------|
| <b>Category</b>                                           | <b>IV-23</b>   | <b>IV-11</b>   | <b>IV-6</b>    |
| <b>Targeted exome</b>                                     | 45 Mb          | 64 Mb          | 64 Mb          |
| Average depth of coverage                                 | 51.27          | 56.98          | 50.28          |
| Percentage coverage >10X                                  | 91.74          | 94.94          | 94.36          |
| Total variants                                            | 22,186         | 25,455         | 25,490         |
| Putative pathogenic variants <sup>a</sup>                 | 521            | 642            | 610            |
| <b>Refined <i>DFNB86</i> linkage interval<sup>b</sup></b> |                |                |                |
| Average depth of coverage                                 | 41.52          | 64.78          | 39.00          |
| Percentage coverage >10x                                  | 79.29          | 92.90          | 84.84          |
| Total variants                                            | 45             | 50             | 61             |
| Putative pathogenic variants <sup>a</sup>                 | 3              | 3              | 3              |

<sup>a</sup>Homozygous missense, synonymous, truncating, or splice site variants which are not in a duplicated region and have a minor allele frequency < 0.01 in 1000 Genomes and NHLBI-ESP6500.

<sup>b</sup>2.05-Mb interval between genetic markers *rs2072042* and *D16S3070*.

**Table S3. SNP Genotypes Across a 477 Kb Genomic Interval Encompassing *TBC1D24***

| <b>Position</b>       |               |                            |                         |                         |                  |
|-----------------------|---------------|----------------------------|-------------------------|-------------------------|------------------|
| <b>SNP Marker</b>     | <b>(hg19)</b> | <b><sup>a</sup>PKDF799</b> | <b>DEM4221</b>          | <b>DEM4587</b>          | <b>DEM4476</b>   |
| rs26840               | 2,285,357     | T/T                        | T/T                     | T/T                     | C/C              |
| rs374015103           | 2,499,786     | TCCCCTCCA/<br>TCCCCTCCA    | TCCCCTCCA/<br>TCCCCTCCA | TCCCCTCCA/<br>TCCCCTCCA | <sup>b</sup> -/- |
| <sup>a</sup> c.208G>T | 2,546,357     | T/T                        | T/T                     | T/T                     | G/G              |
| rs76267944            | 2,551,015     | T/T                        | T/T                     | T/T                     | C/C              |
| rs144374231           | 2,762,774     | T/T                        | T/T                     | T/T                     | C/C              |
| unknown               | 2,762,878     | T/T                        | T/T                     | T/T                     | C/C              |

<sup>a</sup>Families PKDF799, DEM4221, and DEM4587 co-segregate deafness with the c.208G>T allele (p.Asp70Tyr) of *TBC1D24* whereas family DEM4476 co-segregates deafness with c.878G>C (p.Arg293Pro) of *TBC1D24*.

<sup>b</sup>The allele of this SNP without the 9 bp insertion.
